# Supplementary material for: Non-equivalent Mn4+ doping into A2NaScF6 (A = K, Rb, Cs) hosts toward short fluorescence lifetime for backlight display application
Source: Royal Society of Chemistry journal article supplement (doi:10.1039/c9tc02564b), 2019-01-01
Supplement: c9tc02564b1.pdf [file c9tc02564b1.pdf]

## Electronic Supporting Information

### Non-equivalent Mn<sup>4+</sup> doping into A<sub>2</sub>NaScF<sub>6</sub> (A = K, Rb, Cs) hosts toward short fluorescence lifetime for backlight display application

Y. Y. Zhou <sup>a</sup>, E. H. Song <sup>a</sup>, M. G. Brik <sup>bcd</sup>, Y. J. Wang <sup>a</sup>, T. Hu <sup>a</sup>, Z. G. Xia <sup>a</sup> and Q. Y. Zhang <sup>a\*</sup>

<sup>a</sup> State Key Laboratory of Luminescent Materials and Devices, South China University of Technology, Guangzhou, 510641, P. R. China.

<sup>b</sup> College of Science, Chongqing University of Posts and Telecommunications, Chongqing, 400065, P. R. China.

<sup>c</sup> Institute of Physics, University of Tartu, W. Ostwald Str 1, Tartu, 50411, Estonia.

<sup>d</sup> Institute of Physics, Jan Długosz University, Armii Krajowej 13/15, PL-42200 Częstochowa, Poland.

\*Corresponding author E-mail: qyzhang@scut.edu.cn

#### 1. Crystal field calculations

The energy levels of impurity ions with an unfilled d-shell in a crystal field (CF) of arbitrary symmetry can be calculated by diagonalizing the following CF Hamiltonian in the framework of the exchange charge model (ECM) of crystal field: <sup>1</sup>

$$H = \sum_{p=2,4} \sum_{k=-p}^p B_p^k O_p^k \quad (1)$$

where  $O_p^k$  are the linear combinations of the irreducible tensor operators acting on the angular parts of the impurity ion's wave functions, and  $B_p^k$  are the crystal field parameters (CFPs), which can be calculated from the crystal structure data. The Hamiltonian (1) is

defined in the space spanned by all wave functions of the free ion's LS terms (which arise due to the Coulomb interaction between electrons of an impurity ion). In ECM the CFPs are expressed as a sum of two terms :<sup>1</sup>

$$B_p^k = B_{p,q}^k + B_{p,S}^k \quad (2)$$

with

$$B_{p,q}^k = -K_p^k e^2 \langle r^p \rangle \sum_i q_i \frac{V_p^k(\theta_i, \varphi_i)}{R_i^{p+1}} \quad (3)$$

and

$$B_{p,S}^k = K_p^k e^2 \frac{2(2p+1)}{5} \sum_i \left( G_s S(s)_i^2 + G_\sigma S(\sigma)_i^2 + \gamma_p G_\pi S(\pi)_i^2 \right) \frac{V_p^k(\theta_i, \varphi_i)}{R_i} \quad (4)$$

The first term  $B_{p,q}^k$  describes the point charge contribution to the CFPs, which arises from the electrostatic interaction between the central ion and the lattice ions enumerated by index  $i$  with charges  $q_i$  and spherical coordinates,  $R_i, \theta_i, \varphi_i$ . The averaged values  $\langle r^p \rangle$ , where  $r$  is the radial coordinate of the  $d$  electrons of the optical center (they are also called the moments of the 3d electron density), can be obtained either from the literature or calculated numerically, using the radial parts of the corresponding ion's wave functions. The values of the numerical factors  $K_p^k, \gamma_p$ , the expressions for the polynomials  $V_p^k$  and the definitions of the operators  $O_p^k$  can all be found in Ref. <sup>1</sup> and thus are not shown here for the sake of brevity.

The second term of Eq. (2)  $B_{p,S}^k$  is proportional to the overlap between the wave functions of the central ion and ligands and thus includes all covalent effects. The  $S(s), S(\sigma), S(\pi)$  terms correspond to the overlap integrals between the  $d$ -functions of the central ion and  $p$ - and  $s$ -functions of the ligands:  $S(s) = \langle d0|s0 \rangle, S(\sigma) = \langle d0|p0 \rangle, S(\pi) = \langle d1|p1 \rangle$ . The  $G_s, G_\sigma, G_\pi$  entries are dimensionless adjustable parameters of the model, whose values are determined from the positions of the first three absorption bands in the experimental spectrum. They can be approximated to a single value, i.e.  $G_s = G_\sigma = G_\pi = G$ , which then can be estimated from one (lowest in energy)

absorption band only.<sup>1</sup> The summation in Eq. (4) is extended only to the nearest neighbors of an impurity ion (i.e. six ligands in the case of an octahedral impurity centers formed by the  $\text{Mn}^{4+}$  ions), since the overlap with the ions from the further (second, third etc) coordination spheres can be safely neglected.

The ECM employs a small number of fitting parameters and allows for calculating the crystal field parameters and energy levels of impurities in crystals without making any assumptions about the impurity center symmetry. The reliability and vitality of the ECM is confirmed by its success in calculating the energy level of the transition metal and rare earth ions.<sup>1-4</sup>

In the present work the experimental structural data were used to generate clusters consisting of more than 78000 atoms, to ensure proper convergence of the crystal lattice sums. The results of CFPs calculations are shown in **Table S5**, whereas **Table S6** collects the calculated  $\text{Mn}^{4+}$  energy levels in the experimentally studied range.

The octahedral symmetry of the  $\text{Mn}^{4+}$  sites is confirmed by the structure of the crystal field Hamiltonian, in which only two CFPs  $B_4^4$  and  $B_4^0$  differ from zero. In addition, the degeneracy of all orbital triplet and doublet states is kept.

## 2. Figures

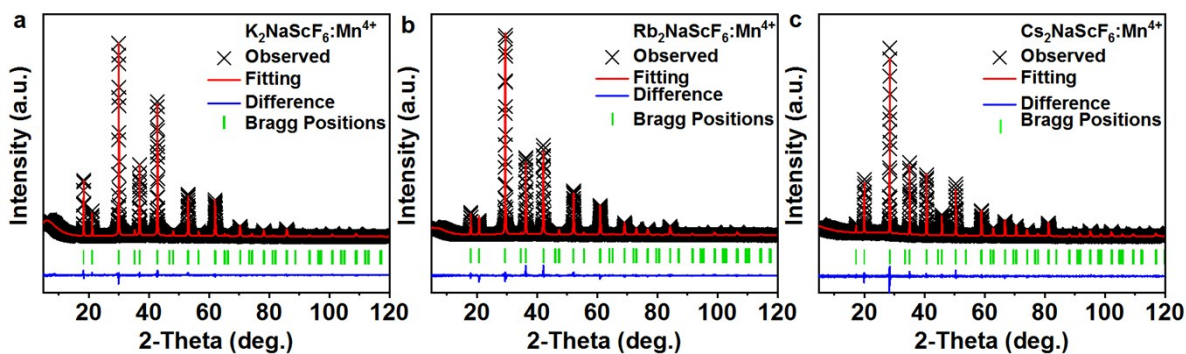

**Fig. S1.** XRD Rietveld refinement patterns of (a) KNSF (1.30 %), (b) RNSF (1.41 %) and (c) CNSF (1.24 %) phosphors.

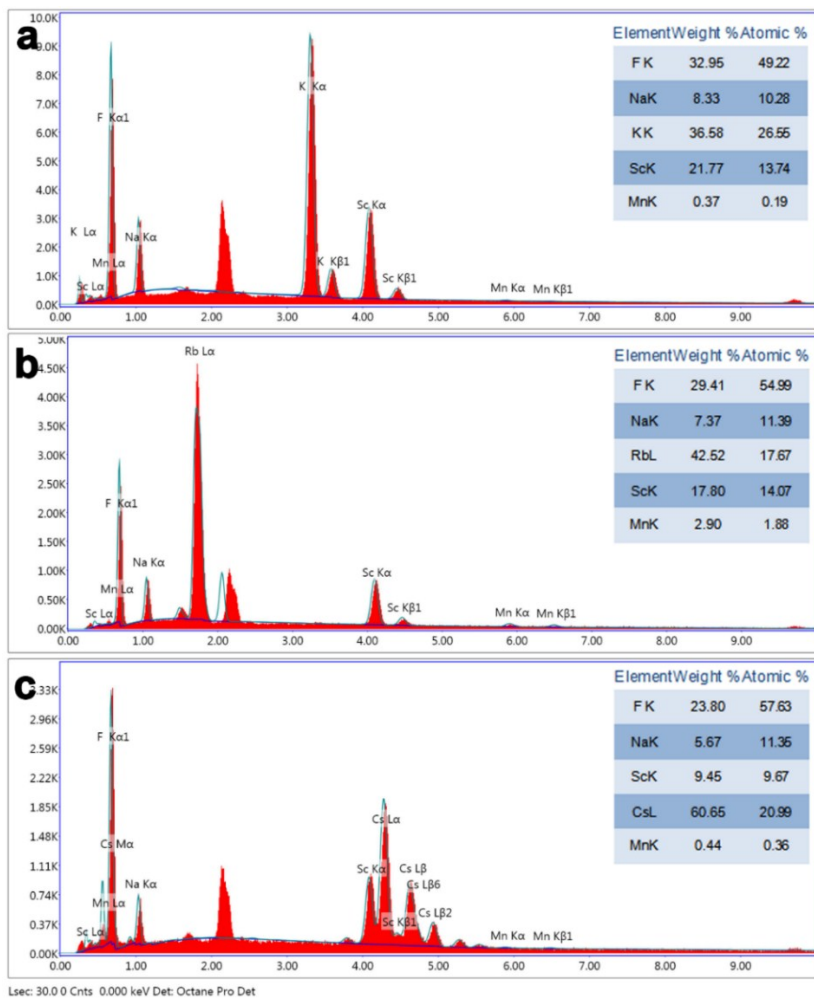

**Fig. S2.** EDS results of optimized (a) KNSF (1.30 %), (b) RNSF (1.41 %) and (c) CNSF (1.24 %) phosphors.

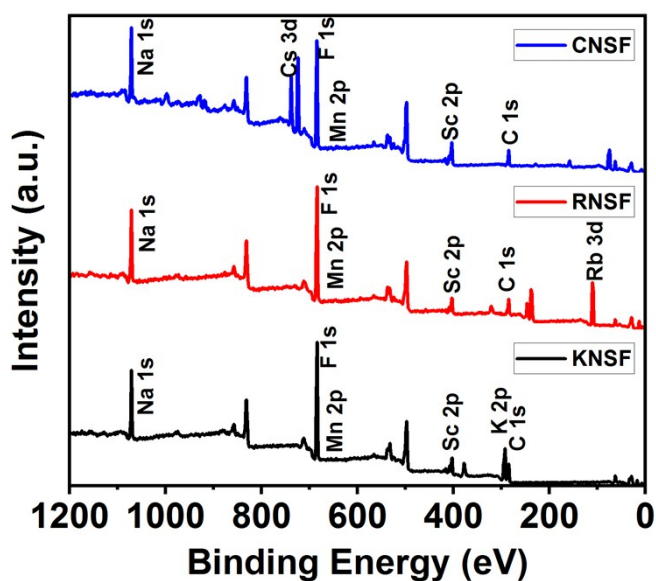

**Fig. S3.** XPS spectra of optimized KNSF, RNSF and CNSF phosphors.

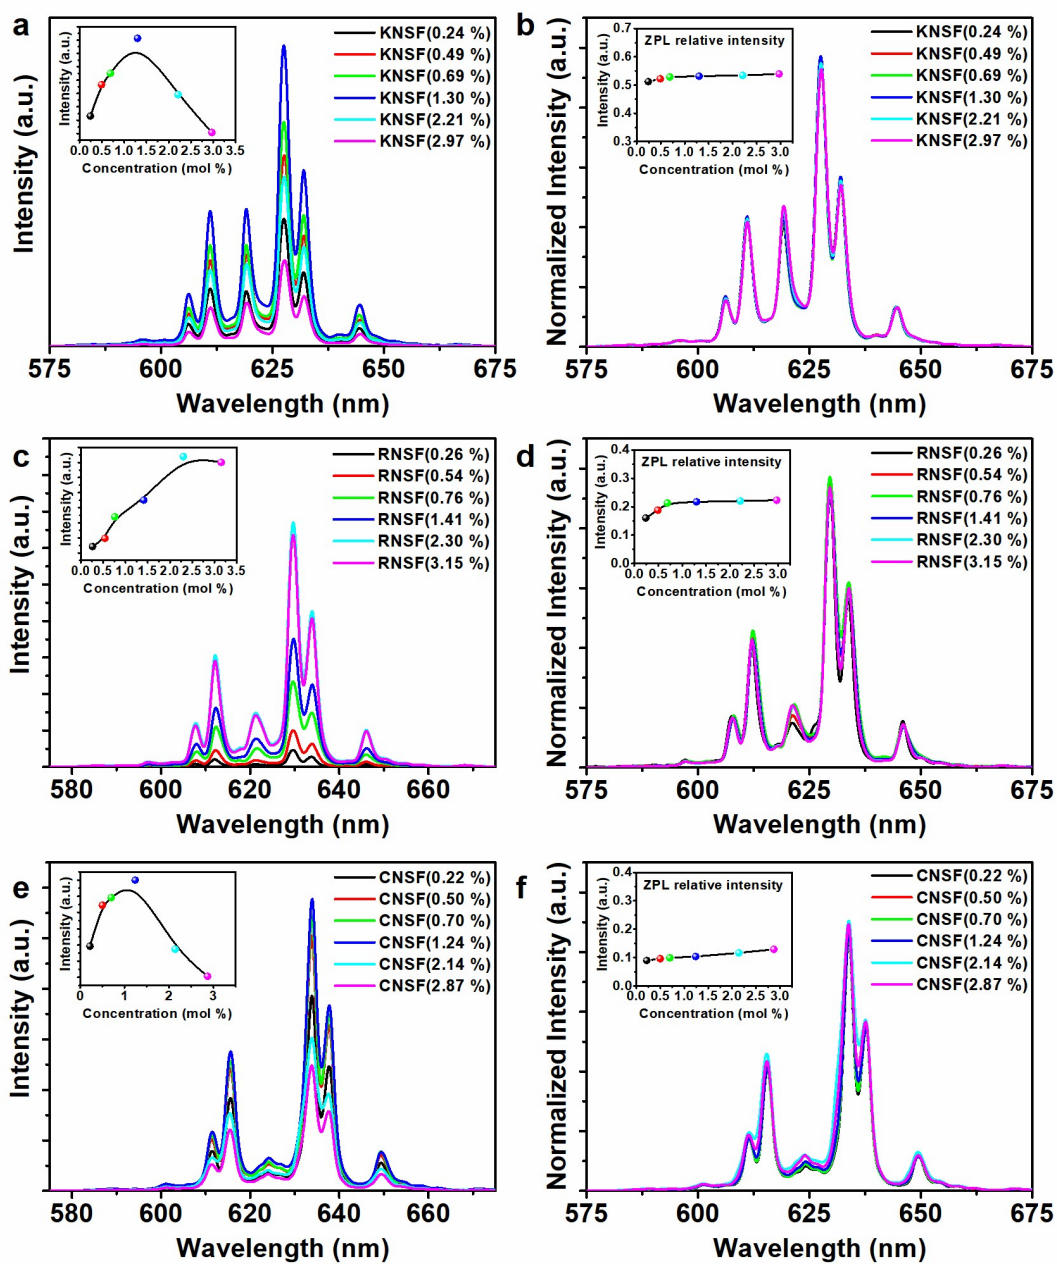

**Fig. S4.** PL spectra and integrated intensity (embedded Fig.) of (a) KNSF, (c) RNSF and (e) CNSF phosphors with different Mn<sup>4+</sup> doping concentration, respectively. Normalized PL spectra and the changes of relative ZPL intensity (embedded Fig.) of (b) KNSF, (d) RNSF and (f) CNSF phosphors with different Mn<sup>4+</sup> doping concentration, respectively.

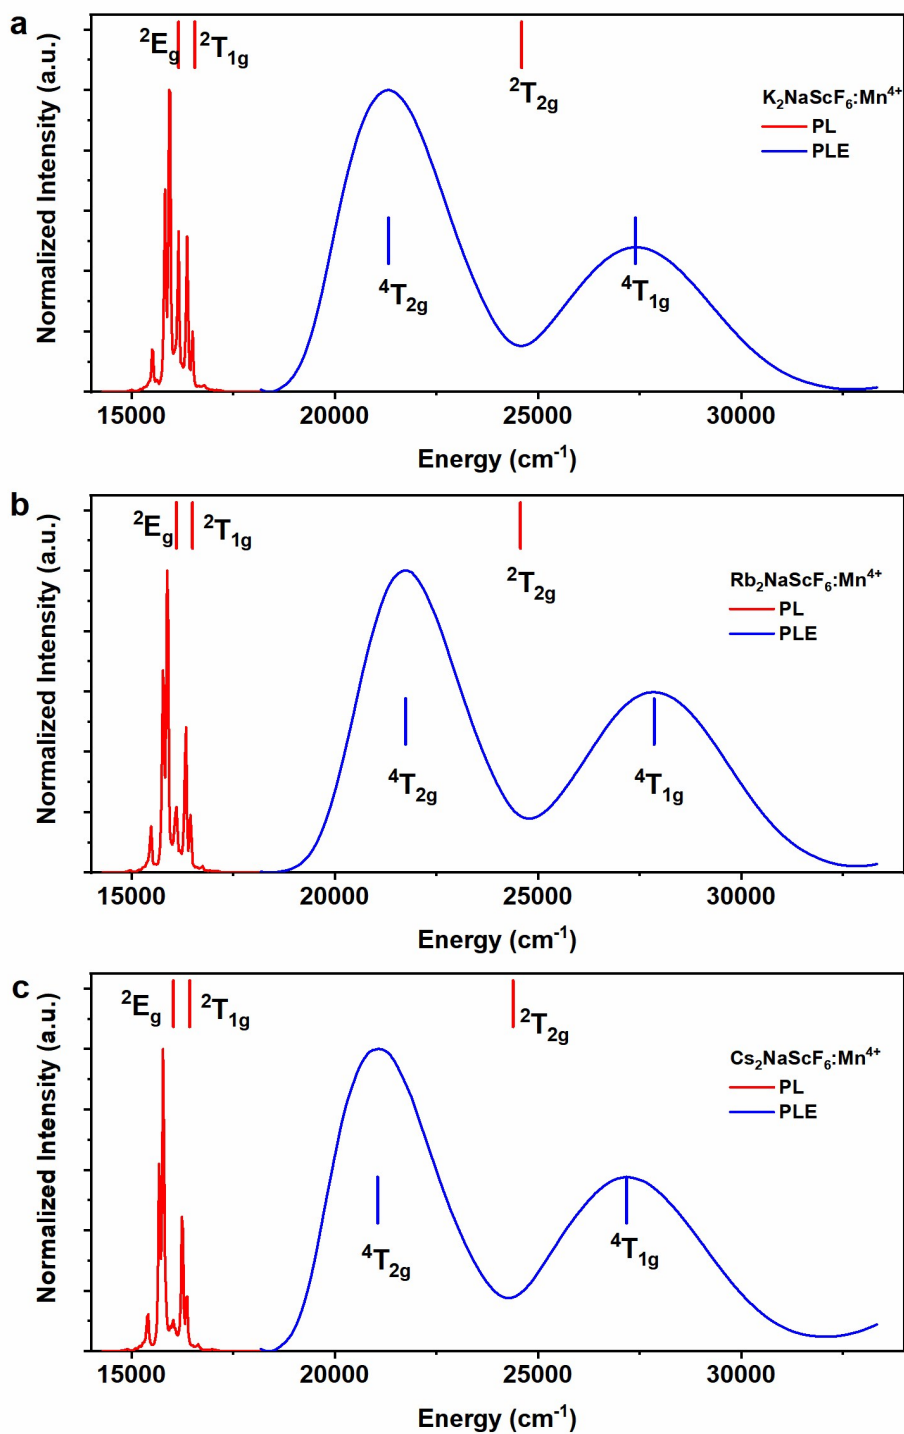

**Fig. S5.** Experimental excitation/emission spectra and  $Mn^{4+}$  calculated energy levels in (a)  $K_2NaScF_6$ , (b)  $Rb_2NaScF_6$  and (c)  $Cs_2NaScF_6$ .

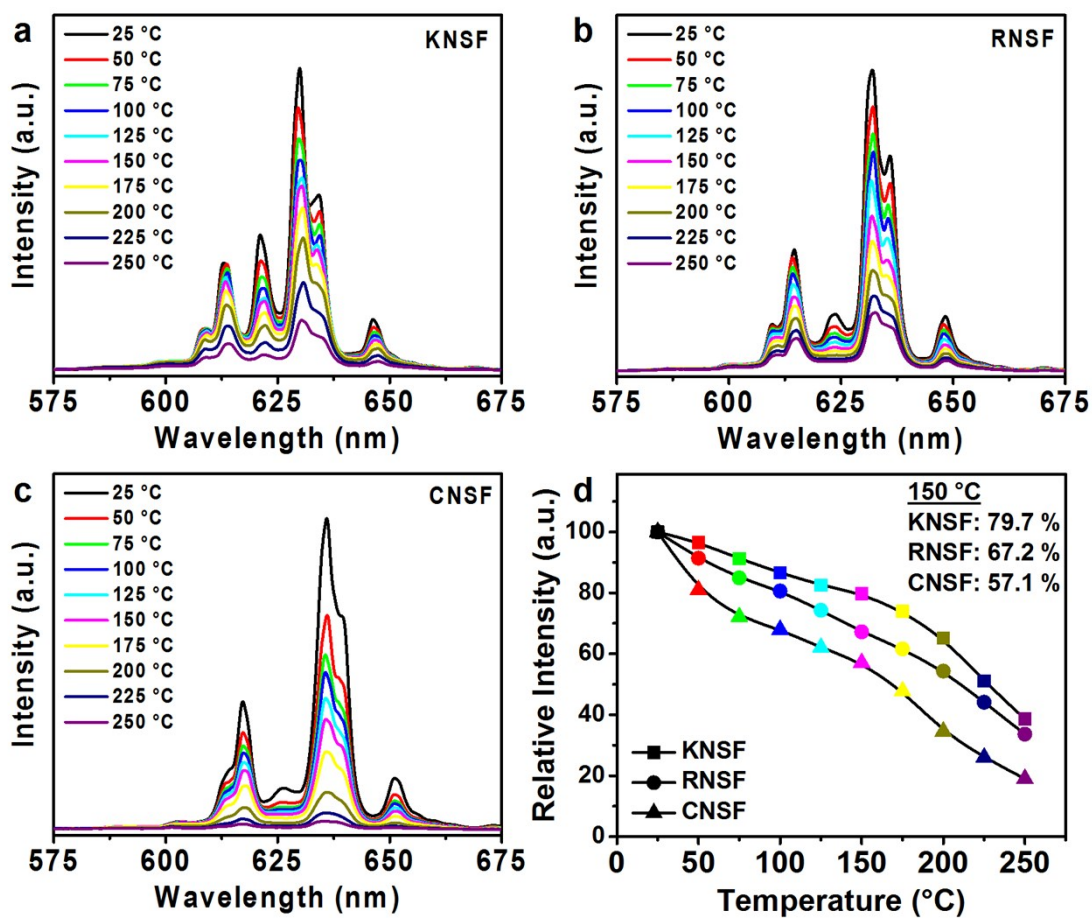

**Fig. S6.** Temperature-dependent PL spectra of the optimized ANSF phosphors: (a) KNSF (1.30 %), (b) RNSF (1.41 %) and (c) CNSF (1.24 %) phosphors. (d) The relative intensities of ANSF phosphors under different temperatures.

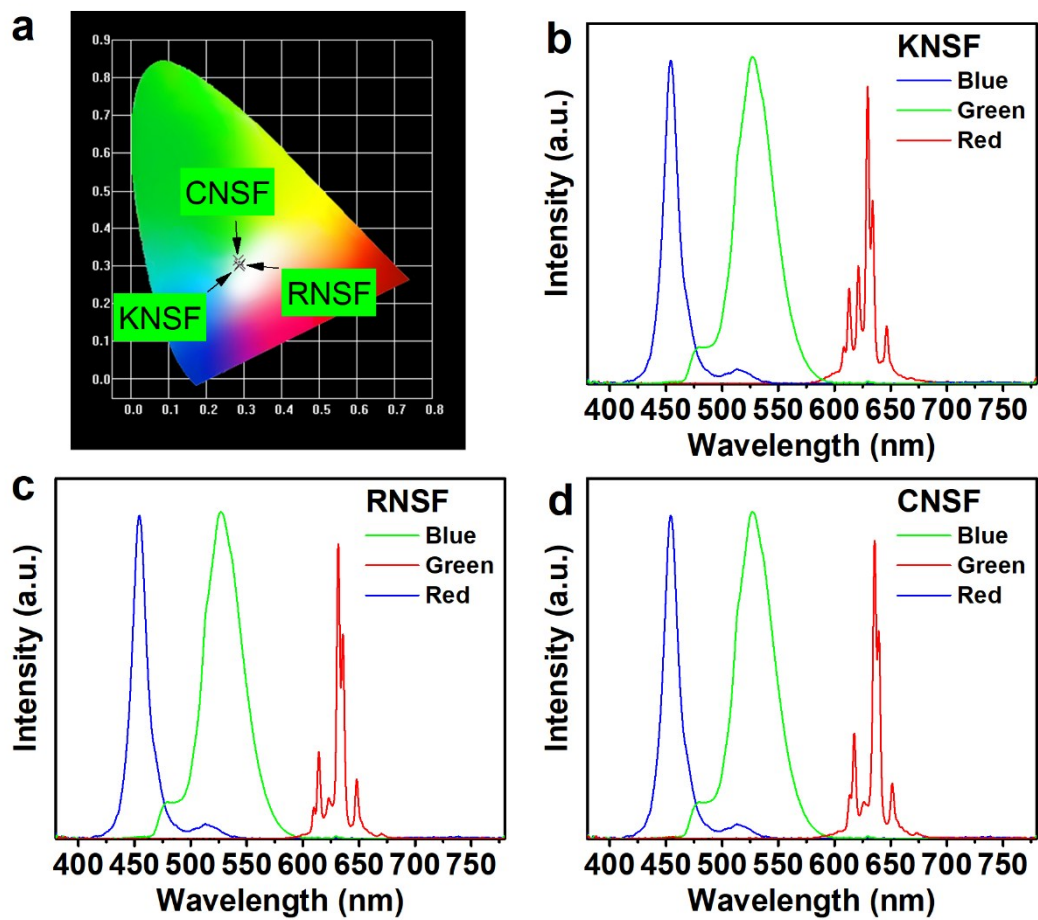

**Fig. S7.** (a) CIE chromaticity coordinates distribution of each WLED. RGB spectra of different WLEDs after filtered by CFs: (b) KNSF, (c) RNSF and (d) CNSF.



### 3. Tables

**Table S1.** The fluorescence lifetime and structure of typical Mn<sup>4+</sup>-doped fluoride phosphors.

| Phosphors                                           | Lifetime<br>$\tau_{1/e}$ (ms) | ZPL    | Structure    | Space group             | conc. (mol %) | Ref. |
|-----------------------------------------------------|-------------------------------|--------|--------------|-------------------------|---------------|------|
| Na <sub>2</sub> SiF <sub>6</sub> :Mn <sup>4+</sup>  | 5.80                          | Strong | Trigonal     | $D_3^2 - P321$          | -             | 5    |
| K <sub>2</sub> SiF <sub>6</sub> :Mn <sup>4+</sup>   | 8.30                          | weak   | Cubic        | $O_h^5 - Fm\bar{3}m$    | -             | 6    |
| K <sub>3</sub> SiF <sub>7</sub> :Mn <sup>4+</sup>   | 5.80                          | Weak   | Tetragonal   | P4/mbm                  | 1             | 7    |
| Rb <sub>2</sub> SiF <sub>6</sub> :Mn <sup>4+</sup>  | 8.26                          | Weak   | Cubic        | $O_h^5 - Fm\bar{3}m$    | -             | 8    |
| Rb <sub>3</sub> SiF <sub>7</sub> :Mn <sup>4+</sup>  | 5.38                          | Weak   | Tetragonal   | P4/mbm                  | 1             | 7    |
| Cs <sub>2</sub> SiF <sub>6</sub> :Mn <sup>4+</sup>  | 7.81                          | Weak   | Cubic        | $O_h^5 - Fm\bar{3}m$    | 10.75         | 9    |
| Na <sub>2</sub> GeF <sub>6</sub> :Mn <sup>4+</sup>  | 6.58                          | Strong | Trigonal     | $D_3^2 - P321$          | < 10          | 10   |
| K <sub>2</sub> GeF <sub>6</sub> :Mn <sup>4+</sup>   | 6.68                          | Weak   | Trigonal     | $D_{3d}^3 - P\bar{3}m1$ | < 3           | 10   |
| Rb <sub>2</sub> GeF <sub>6</sub> :Mn <sup>4+</sup>  | 6.02                          | Weak   | Trigonal     | $D_{3d}^3 - P\bar{3}m1$ | < 0.8         | 10   |
| Rb <sub>2</sub> GeF <sub>6</sub> :Mn <sup>4+</sup>  | 5.8                           | Strong | Hexagonal    | $C_{6v}^4 - P63mc$      | -             | 11   |
| Cs <sub>2</sub> GeF <sub>6</sub> :Mn <sup>4+</sup>  | 7.52                          | Weak   | Cubic        | $O_h^5 - Fm\bar{3}m$    | < 3           | 10   |
| K <sub>2</sub> TiF <sub>6</sub> :Mn <sup>4+</sup>   | 5.70                          | Weak   | Trigonal     | $D_{3d}^3 - P\bar{3}m1$ | 5.5           | 12   |
| Rb <sub>2</sub> TiF <sub>6</sub> :Mn <sup>4+</sup>  | 5.20                          | Weak   | Trigonal     | $D_{3d}^3 - P\bar{3}m1$ | -             | 13   |
| Na <sub>3</sub> AlF <sub>6</sub> :Mn <sup>4+</sup>  | 4.68                          | Strong | Monoclinic   | $C_{2h}^5 - P21/c$      | 1.58          | 14   |
| K <sub>3</sub> AlF <sub>6</sub> :Mn <sup>4+</sup>   | 3.50                          | Strong | Cubic        | $O_h^5 - Fm\bar{3}m$    | 3.41          | 15   |
| K <sub>2</sub> NaAlF <sub>6</sub> :Mn <sup>4+</sup> | 6.63                          | Strong | Cubic        | $O_h^5 - Fm\bar{3}m$    | 2.03          | 16   |
| Cs <sub>3</sub> AlF <sub>6</sub> :Mn <sup>4+</sup>  | 2.83                          | Weak   | Cubic        | $O_h^5 - Fm\bar{3}m$    | 1.83          | 17   |
| K <sub>2</sub> NaGaF <sub>6</sub> :Mn <sup>4+</sup> | 5.68                          | Strong | Cubic        | $O_h^5 - Fm\bar{3}m$    | -             | 18   |
| K <sub>2</sub> NbF <sub>7</sub> :Mn <sup>4+</sup>   | 3.7                           | Strong | Monoclinic   | $P121$                  | < 1           | 19   |
| KTeF <sub>5</sub> :Mn <sup>4+</sup>                 | 3.29                          | Medium | Orthorhombic | $Pbcm$                  | 0.23          | 20   |

|                                                                  |      |        |              |                      |       |    |
|------------------------------------------------------------------|------|--------|--------------|----------------------|-------|----|
| KZnF <sub>3</sub> :Mn <sup>4+</sup>                              | 3.43 | Strong | Cubic        | $O_h^5 - Fm\bar{3}m$ | < 0.5 | 21 |
| Na <sub>2</sub> WO <sub>2</sub> F <sub>4</sub> :Mn <sup>4+</sup> | 1.05 | Strong | Orthorhombic | <i>Pbcn</i>          | < 0.5 | 22 |

**Table S2.** ICP results of Mn concentration of A<sub>2</sub>NaSc<sub>1-x</sub>Mn<sub>x</sub>F<sub>6</sub> phosphors

| Theoretical concentration (mol %)                                                  |  | Effective concentration (mol %)                                   |                                                                    |                                                                    |
|------------------------------------------------------------------------------------|--|-------------------------------------------------------------------|--------------------------------------------------------------------|--------------------------------------------------------------------|
| K <sub>2</sub> MnF <sub>6</sub> : (NH <sub>4</sub> ) <sub>3</sub> ScF <sub>6</sub> |  | K <sub>2</sub> NaSc <sub>1-x</sub> Mn <sub>x</sub> F <sub>6</sub> | Rb <sub>2</sub> NaSc <sub>1-x</sub> Mn <sub>x</sub> F <sub>6</sub> | Cs <sub>2</sub> NaSc <sub>1-x</sub> Mn <sub>x</sub> F <sub>6</sub> |
| 0.5                                                                                |  | 0.24                                                              | 0.26                                                               | 0.22                                                               |
| 1.0                                                                                |  | 0.49                                                              | 0.54                                                               | 0.50                                                               |
| 1.5                                                                                |  | 0.69                                                              | 0.76                                                               | 0.70                                                               |
| 3.0                                                                                |  | 1.30                                                              | 1.41                                                               | 1.24                                                               |
| 5.0                                                                                |  | 2.21                                                              | 2.30                                                               | 2.14                                                               |
| 7.0                                                                                |  | 2.97                                                              | 3.15                                                               | 2.87                                                               |

**Table S3.** Crystallographic parameters, selected bond lengths, and bond angles from XRD Rietveld refinements of ANSF phosphors.

|                          | KNSF (1.30 %)                | RNSF (1.41 %)                | CNSF (1.24 %)                |
|--------------------------|------------------------------|------------------------------|------------------------------|
| Space group              | <i>Fm</i> $\bar{3}$ <i>m</i> | <i>Fm</i> $\bar{3}$ <i>m</i> | <i>Fm</i> $\bar{3}$ <i>m</i> |
| a = b = c (Å)            | 8.48482(12)                  | 8.60713(10)                  | 8.867(00)                    |
| α = β = γ (°)            | 90                           | 90                           | 90                           |
| Volume (Å <sup>3</sup> ) | 610.840(27)                  | 637.639(23)                  | 697.15(6)                    |
| R <sub>wp</sub> (%)      | 8.47                         | 7.29                         | 9.42                         |
| R <sub>p</sub> (%)       | 6.83                         | 5.58                         | 7.59                         |
| Bond distance (Å)        |                              |                              |                              |
| Sc–F                     | 1.98222(3)                   | 1.98851(3)                   | 2.041(7)                     |
| Na–F                     | 2.26019(4)                   | 2.31506(3)                   | 2.392(7)                     |
| K–F                      | 3.00305(3)                   | -                            | -                            |
| Rb–F                     | -                            | 3.04746(3)                   | -                            |
| Cs–F                     | -                            | -                            | 3.1399(5)                    |
| Sc–Sc                    | 5.99967(6)                   | 6.08616(6)                   | 6.2699(6)                    |

$\angle$  FScF ( $^\circ$ )                      90, 180                      90, 180                      90, 180

**Table S4.** EQE, IQE, and AE of optimal ANSF phosphors.

| Samples | Doped concentration |  | EQE (%) | IQE (%) | AE (%) |
|---------|---------------------|--|---------|---------|--------|
|         | (mol %)             |  |         |         |        |
| KNSF    | 1.30                |  | 9.09    | 57.13   | 15.91  |
| RNSF    | 2.30                |  | 10.38   | 54.98   | 18.88  |
| CNSF    | 1.24                |  | 10.82   | 51.99   | 20.81  |

**Table S5.** Non-zero crystal field parameters  $B_p^k$  (Stevens normalization) and Racah parameters  $B$ ,  $C$  (all in  $\text{cm}^{-1}$ ) for  $\text{Mn}^{4+}$  ion in KNSF, RNSF, and CNSF. The values of the ECM non-dimensional parameter  $G$  are also given.

|         | $\text{K}_2\text{NaScF}_6$ | $\text{Rb}_2\text{NaScF}_6$ | $\text{Cs}_2\text{NaScF}_6$ |
|---------|----------------------------|-----------------------------|-----------------------------|
| $B_4^0$ | 5597                       | 5707                        | 5526                        |
| $B_4^4$ | 27984                      | 28533                       | 27632                       |
| $G$     | 17.38                      | 18.015                      | 15.772                      |
| $B$     | 562                        | 565                         | 568                         |
| $C$     | 3929                       | 3902                        | 3874                        |

**Table S6.** Calculated and experimentally observed energy levels (all in  $\text{cm}^{-1}$ ) for  $\text{Mn}^{4+}$  ions in KNSF, RNSF, and CNSF.

|                                | $\text{K}_2\text{NaScF}_6$ |       | $\text{Rb}_2\text{NaScF}_6$ |       | $\text{Cs}_2\text{NaScF}_6$ |       |
|--------------------------------|----------------------------|-------|-----------------------------|-------|-----------------------------|-------|
|                                | Exp.                       | Calc. | Exp.                        | Calc. | Exp.                        | Calc. |
| $^4\text{A}_{2g} (^4\text{F})$ |                            | 0     |                             | 0     |                             | 0     |
| $^2\text{E}_g (^2\text{G})$    | 16155                      | 16156 | 16103                       | 16102 | 16026                       | 16026 |
| $^2\text{T}_{1g} (^2\text{G})$ |                            | 16550 |                             | 16498 |                             | 16430 |
| $^4\text{T}_{2g} (^4\text{F})$ | 21322                      | 21321 | 21739                       | 21739 | 21053                       | 21053 |
| $^2\text{T}_{2g} (^2\text{G})$ |                            | 24594 |                             | 24565 |                             | 24385 |
| $^4\text{T}_{1g} (^4\text{F})$ | 27397                      | 27393 | 27855                       | 27856 | 27174                       | 27170 |

|                      |       |       |       |
|----------------------|-------|-------|-------|
| ${}^4T_{1g} ({}^4P)$ | 44999 | 45838 | 44508 |
|----------------------|-------|-------|-------|

**Table S7.** Important experimental spectra wavelengths of ANSF phosphors

|                                     |                | $K_2NaScF_6:Mn^{4+}$ |                             | $Rb_2NaScF_6:Mn^{4+}$ |                             | $Cs_2NaScF_6:Mn^{4+}$ |                             |
|-------------------------------------|----------------|----------------------|-----------------------------|-----------------------|-----------------------------|-----------------------|-----------------------------|
|                                     | vibronic modes | Wavelength h (nm)    | Energ y (cm <sup>-1</sup> ) | Wavelength h (nm)     | Energ y (cm <sup>-1</sup> ) | Wavelength h (nm)     | Energ y (cm <sup>-1</sup> ) |
| Anti-Stokes emission                | $\nu_3$        | 596                  | 16779                       | 597                   | 16750                       | 601                   | 16639                       |
|                                     | $\nu_4$        | 606                  | 16502                       | 608                   | 16447                       | 611                   | 16367                       |
|                                     | $\nu_6$        | 611                  | 16367                       | 612                   | 16340                       | 616                   | 16234                       |
| ZPL                                 |                | 619                  | 16155                       | 621                   | 16103                       | 624                   | 16026                       |
| Stokes emission                     | $\nu_6$        | 628                  | 15924                       | 630                   | 15873                       | 634                   | 15773                       |
|                                     | $\nu_4$        | 632                  | 15823                       | 634                   | 15773                       | 638                   | 15674                       |
|                                     | $\nu_3$        | 645                  | 15504                       | 646                   | 15480                       | 649                   | 15408                       |
| ${}^4A_{2g} \rightarrow {}^4T_{1g}$ |                | 365                  | 27397                       | 359                   | 27855                       | 368                   | 27174                       |
| ${}^4A_{2g} \rightarrow {}^4T_{2g}$ |                | 469                  | 21322                       | 460                   | 21739                       | 475                   | 21053                       |

**Table S8.** Total formation energy of two kinds of vacancy environment of  $Mn^{4+}$  substituted in a  $3 \times 1 \times 1$  supercell of ANSF.

| Structure | concentration mol % | Cell                  | Total formation energy (eV) |            |
|-----------|---------------------|-----------------------|-----------------------------|------------|
|           |                     |                       | $V_{Sc}'''$                 | $V_{Na}'$  |
| KNSF      | 8.33                | $3 \times 1 \times 1$ | -628.71509                  | -634.0716  |
| RNSF      | 8.33                | $3 \times 1 \times 1$ | -624.65489                  | -630.52759 |
| CNSF      | 8.33                | $3 \times 1 \times 1$ | -621.61315                  | -627.73708 |

**Table S9.** Photoelectric properties of WLEDs and color gamut for LCD backlights

| Phosphor                         |                       | CCT (K) | LE (lm/W)      | Color gamut (% NTSC) | Ref. |
|----------------------------------|-----------------------|---------|----------------|----------------------|------|
| Green                            | Red                   |         |                |                      |      |
| $\beta$ -Sialon:Eu <sup>2+</sup> | CASN:Eu <sup>2+</sup> | 8620    | 38 (20 mA)     | 82.1                 | 23   |
| $\beta$ -Sialon:Eu <sup>2+</sup> | $K_2SiF_6:Mn^{4+}$    | 8000    | 94 (120 mA)    | 85.9                 | 24   |
|                                  | YAG:Ce <sup>3+</sup>  | 8000    | 105 (60 mA)    | 67.9                 | 25   |
| $\beta$ -Sialon:Eu <sup>2+</sup> | $K_2NbF_7:Mn^{4+}$    | 11338   | 94.68 (120 mA) | 86.7                 | 19   |



## Reference

1. B. Z. Malkin, *Crystal Field and Electron-Phonon Interaction in Rare-Earth Ionic Paramagnets*, Elsevier, 1987.
2. M. G. B. Nicolae M. Avram, *Optical Properties of 3d-Ions in Crystals: Spectroscopy and Crystal Field Analysis*, Springer Berlin Heidelberg, 2013.
3. M. M. Medić, M. G. Brik, G. Dražić, Ž. M. Antić, V. M. Lojpur and M. D. Dramićanin, *J. Phys. Chem. C*, 2015, **119**, 724-730.
4. V. Đorđević, M. G. Brik, A. M. Srivastava, M. Medić, P. Vulić, E. Glais, B. Viana and M. D. Dramićanin, *Opt. Mater.*, 2017, **74**, 46-51.
5. H.-D. Nguyen, C. C. Lin, M.-H. Fang and R.-S. Liu, *J. Mater. Chem. C*, 2014, **2**, 10268-10272.
6. J. W. Moon, B. G. Min, J. S. Kim, M. S. Jang, K. M. Ok, K. Y. Han and J. S. Yoo, *Opt. Mater.*, 2016, **6**, 782-792.
7. M. Kim, W. B. Park, J. W. Lee, J. Lee, C. H. Kim, S. P. Singh and K.-S. Sohn, *Chem. Mater.*, 2018, **30**, 6936-6944.
8. M.-H. Fang, H.-D. Nguyen, C. C. Lin and R.-S. Liu, *J. Mater. Chem. C*, 2015, **3**, 7277-7280.
9. E. H. Song, Y. Y. Zhou, X. B. Yang, Z. F. Liao, W. R. Zhao, T. T. Deng, L. Y. Wang, Y. Y. Ma, S. Ye and Q. Y. Zhang, *ACS Photonics*, 2017, **4**, 2556-2565.
10. H. Z. Lian, Q. M. Huang, Y. Q. Chen, K. Li, S. S. Liang, M. M. Shang, M. M. Liu and J. Lin, *Inorg. Chem.*, 2017, **56**, 11900-11910.
11. S. Sakurai, T. Nakamura and S. Adachi, *Jpn. J. Appl. Phys.*, 2018, **57**.
12. H. M. Zhu, C. C. Lin, W. Q. Luo, S. T. Shu, Z. G. Liu, Y. S. Liu, J. T. Kong, E. Ma, Y. G. Cao, R. S. Liu and X. Y. Chen, *Nat. Commun.*, 2014, **5**, 4312.
13. S. Sakurai, T. Nakamura and S. Adachi, *ECS J. Solid State Sci. Technol.*, 2016, **5**, R206-R210.
14. E. H. Song, J. Q. Wang, S. Ye, X. F. Jiang, M. Y. Peng and Q. Y. Zhang, *J. Mater. Chem. C*, 2016, **4**, 2480-2487.
15. E. H. Song, J. Q. Wang, J. H. Shi, T. T. Deng, S. Ye, M. Y. Peng, J. Wang, L. Wondraczek and Q. Y. Zhang, *ACS Appl. Mater. Inter.*, 2017, **9**, 8805-8812.
16. L. Y. Wang, E. H. Song, T. T. Deng, Y. Y. Zhou, Z. F. Liao, W. R. Zhao, B. Zhou and Q. Y. Zhang, *Dalton. Trans.*, 2017, **46**, 9925-9933.
17. H. Ming, J. Zhang, L. Liu, J. Peng, F. Du and X. Ye, *ECS J. Solid State Sci. Technol.*, 2018, **7**, R149-R155.
18. C. Y. Jiang, M. G. Brik, L. H. Li, L. Y. Li, J. Peng, J. N. Wu, M. S. Molokeev, K. L. Wong and M. Y. Peng, *J. Mater. Chem. C*, 2018, **6**, 3016-3025.
19. H. Lin, T. Hu, Q. Huang, Y. Cheng, B. Wang, J. Xu, J. Wang and Y. Wang, *Laser Photonics Rev.*, 2017, **11**, 1700148.
20. T. T. Deng, E. H. Song, J. Su, Y. Y. Zhou, L. Y. Wang, S. Ye and Q. Y. Zhang, *J. Mater. Chem. C*, 2018, **6**, 4418-4426.
21. T. Hu, H. Lin, F. Lin, Y. Gao, Y. Cheng, J. Xu and Y. Wang, *J. Mater. Chem. C*, 2018, **6**, 10845-10854.
22. T. Hu, H. Lin, Y. Gao, J. Xu, J. Wang, X. Xiang and Y. Wang, *J. Am. Ceram. Soc.*, 2018, **101**, 3437-3442.

23. R. J. Xie, N. Hirosaki and T. Takeda, *Appl Phys Express*, 2009, **2**, 022401-022401-022403.
24. L. Wang, X. Wang, T. Kohsei, K. Yoshimura, M. Izumi, N. Hirosaki and R. J. Xie, *Opt. Express*, 2015, **23**, 28707-28717.
25. J. H. Oh, H. Kang, M. Ko and Y. R. Do, *Opt. Express*, 2015, **23**, A791-804.
